# Supplementary material for: Observed versus expected rates of myocarditis after SARS-CoV-2 vaccination: a population-based cohort study
Source: PubMed Central journal article supplement — CMAJ. 2022 Nov 21;194(45):E1529–36. doi: 10.1503/cmaj.220676 (PMC9828950; doi:10.1503/cmaj.220676), 2022-11-21
Supplement: 220676-res-1-at.pdf [file 220676-res-1-at.pdf]

## Appendix

### Data sources

The BC COVID-19 Cohort (BCC19C) was established as a public health surveillance platform under BCCDC's public health mandate. The BCC19C includes provincial registries and administrative healthcare databases. These datasets are integrated through the combination of enterprise-level probabilistic and deterministic algorithms, which have been established over many years and validated for surveillance use in British Columbia. Each dataset integrated into the BCC19C is de-identified, but datasets can be linked using an anonymized patient master key (PMK). This PMK allows the linkage of records from the individual across the datasets. Authorized users can access the datasets through a secure cloud-based environment.

Within the BCC19C, our study used the Discharge Abstract Database (DAD), the National Ambulatory Care Reporting System (NACRS) data from health authorities (HA) and the Ministry of Health (MOH), and the COVID-19 vaccine data. NACRS and DAD are updated weekly; however, there is a lag of 4-5 months in the data between the actual hospitalization/visit date and data update. Due to a lag in data, we have updated the results with the data to March 31, 2022. The COVID-19 vaccine data is refreshed daily, and there is only 1–2-day lag from vaccine administration to the data integration.

**Table S1. Data Sources integrated within the BC COVID-19 Cohort (BCC19C)**

| <b>British Columbia Centre for Disease Control (BCCDC), Provincial Health Services Authority (PHSA) and Regional Health Authority data sources:</b>    | <b>Data Date Ranges:</b> |
|--------------------------------------------------------------------------------------------------------------------------------------------------------|--------------------------|
| Integrated COVID-19 laboratory dataset (SARS-CoV2 tests from private/public labs) <sup>S1</sup>                                                        | Jan,2020-onward          |
| COVID-19 surveillance case data (information collected on all probable/confirmed cases as part of public health follow up) <sup>S2</sup>               | Jan,2020-onward          |
| Provincial COVID-19 Monitoring Solution (critical and non-critical care hospital census data) <sup>S3</sup>                                            | Jan,2020-onward          |
| Provincial Immunizations Registry (COVID-19 vaccination data) <sup>S4</sup>                                                                            | Dec,2020-onward          |
| Provincial Laboratory Information Solution (laboratory tests from private/public labs) <sup>S5</sup>                                                   | Jan,2020-onward          |
| Public Health Reporting Data warehouse (Influenza laboratory tests) <sup>S6</sup>                                                                      | Jan,2008-onward          |
| Emergency department visits (hospital-based and community-based ambulatory care)                                                                       | Mar,2020-onward          |
| <b>Ministry of Health (MoH) Administrative Data Sources:</b>                                                                                           | <b>Data Date Ranges:</b> |
| Client Roster (CR) (registry of enrollment in the universal public health insurance plan including residential history) <sup>S7</sup>                  | 2008/9-onward            |
| Discharge Abstracts Database (DAD) (hospital discharge records) <sup>S8</sup>                                                                          | 2008/9-onward            |
| Medical Services Plan (MSP) (physician diagnostic and billing data for services provided through universal public health insurance plan) <sup>S9</sup> | 2008/9-onward            |

|                                                                                                                                                                |                |
|----------------------------------------------------------------------------------------------------------------------------------------------------------------|----------------|
| PharmaNet (Pharma) (prescription drugs dispensed from community pharmacies, includes medications covered by public and private insurance plans) <sup>S10</sup> | 2008/9-onward  |
| BC Vital Statistics (VS) (deaths registry) <sup>S11</sup>                                                                                                      | 2008/9-onward  |
| National Ambulatory Care Reporting System (NACRS) (hospital-based and community-based ambulatory care) <sup>S12</sup>                                          | 2011/12–onward |
| Chronic Disease Registry <sup>S13</sup>                                                                                                                        | 2008/9-2018/19 |
| 811 Calls (respiratory calls only) <sup>S14*</sup>                                                                                                             | 2014-onward    |
| Health System Matrix <sup>S15</sup>                                                                                                                            | 2018/19-onward |
| Population Grouper Methodology <sup>S16</sup>                                                                                                                  | 2008/9-onward  |

---

\* A free-of-charge provincial health information and advice phone line operated by HealthLink BC, which is part of the Ministry of Health. The service can connect the caller directly with a registered nurse, a registered dietitian, a qualified exercise professional, or a pharmacist.

## Administrative codes

There are very little data on the validation of myocarditis ICD-10 codes in the literature. The only validation study<sup>S17</sup> validated a much broader definition of myocarditis (including where a specific cause is known, such as viruses) that does not apply to vaccine-related myocarditis. In our study, we have used a very specific set of codes. An expert consensus on these codes was arrived at through the Global Vaccine Data Network (GVDN), a multi-country collaboration on vaccine safety and effectiveness (<https://www.globalvaccinatedatanetwork.org/>). GVDN comprises subject experts, epidemiologists, and biostatisticians. We used the same codes as being used in the GVDN COVID-19 vaccine safety evaluation collaboration project, which we are part of.

In addition to diagnostic codes, we used laboratory data to assess whether a test for troponin levels was performed within 30 days of vaccination for our cases. We found that 98% of myocarditis cases identified through the ICD codes within 21-days of vaccination had at least one troponin test. Among those, 91% had troponin levels higher than normal.

## Supplementary References:

- S1. British Columbia Centre for Disease Control [creator]. Integrated COVID-19 laboratory dataset (SARS-CoV2 tests from private/public labs). Public Health Reporting Data Warehouse, British Columbia Centre for Disease Control [publisher] (2020). 2021.
- S2. British Columbia Centre for Disease Control [creator]. COVID-19 surveillance case data. British Columbia Centre for Disease Control [publisher]. (2020). 2021.
- S3. Provincial Health Services Authority [creator]. Provincial COVID-19 Monitoring Solution. Provincial Health Services Authority [publisher]. (2020). 2021.
- S4. Provincial Health Services Authority [creator]. COVID-19 vaccination data. Provincial Immunizations Registry, Provincial Public Health Information Systems [publisher]. (2020). 2021.
- S5. Provincial Health Services Authority [creator]. Provincial Public Health Information Systems [publisher]. (2020). 2021.
- S6. British Columbia Centre for Disease Control [creator]. Respiratory datamart, Public Health Reporting Data Warehouse, British Columbia Centre for Disease Control [publisher] (2020). 2021.
- S7. British Columbia Ministry of Health [creator]. Client Roster (Client Registry System/Enterprise Master Patient Index). British Columbia Ministry of Health [publisher]. Data Extract. MOH (2020). 2021. <https://www2.gov.bc.ca/gov/content/health/health-forms/online-services>
- S8. British Columbia Ministry of Health [creator]. Discharge Abstract Database (Hospital Separations). British Columbia Ministry of Health [publisher]. Data Extract. MOH (2020). 2021. <https://www2.gov.bc.ca/gov/content/health/health-forms/online-services>
- S9. British Columbia Ministry of Health [creator]. Medical Services Plan (MSP) Payment Information File. British Columbia Ministry of Health [publisher]. Data Extract. MOH (2020). 2021. <https://www2.gov.bc.ca/gov/content/health/health-forms/online-services>
- S10. British Columbia Ministry of Health [creator]. PharmaNet. British Columbia Ministry of Health [publisher]. Data Extract. MOH (2020). 2021. <https://www2.gov.bc.ca/gov/content/health/health-forms/online-services>
- S11. BC Vital Statistics Agency [creator]. Vital Statistics Deaths. BC Vital Statistics Agency [publisher]. Data Extract. BC Vital Statistics Agency (2020). 2021. <https://www2.gov.bc.ca/gov/content/health/health-forms/online-services>
- S12. British Columbia Ministry of Health [creator]. National Ambulatory Care Reporting System. British Columbia Ministry of Health [publisher]. Data Extract. MOH (2020). 2021. <https://www2.gov.bc.ca/gov/content/health/health-forms/online-services>
- S13. British Columbia Ministry of Health [creator]. Chronic Disease Registry. British Columbia Ministry of Health [publisher]. Data Extract. MOH (2020). 2020. <https://www2.gov.bc.ca/gov/content/health/health-forms/online-services>
- S14. British Columbia Ministry of Health [creator]. 811 calls. British Columbia Ministry of Health [publisher]. Data Extract. MOH (2020). 2021. <https://www2.gov.bc.ca/gov/content/health/health-forms/online-services>
- S15. British Columbia Ministry of Health [creator]. Health System Matrix. British Columbia Ministry of Health [publisher]. Data Extract. MOH (2020). 2021. <https://www2.gov.bc.ca/gov/content/health/health-forms/online-services>
- S16. British Columbia Ministry of Health [creator]. Population Grouper Methodology. British Columbia Ministry of Health [publisher]. Data Extract. MOH (2020). 2021. <https://www2.gov.bc.ca/gov/content/health/health-forms/online-services>
- S17. Sundboll J, Adelborg K, Munch T, et al. Positive predictive value of cardiovascular diagnoses in the Danish National Patient Registry: a validation study. *BMJ Open* 2016;6:e012832.

**Table S2: Ratio of observed versus expected rates of myocarditis among females following mRNA Covid-19 vaccination in British Columbia\***

| 7-DAY RISK WINDOW  |                     |                    |                     |                     |
|--------------------|---------------------|--------------------|---------------------|---------------------|
| Age Groups (Years) | Pfizer              |                    |                     |                     |
|                    | OE Ratio (95% CI)   |                    |                     |                     |
|                    | All doses           | Dose 1             | Dose 2              | Dose 3              |
| 12-17              | 24.28 (2.94-87.71)  | 0.00 (0.00-103.41) | 58.92 (7.14-212.84) | 0.00 (0.00-315.53)  |
| 18-29              | 9.81 (2.02-28.68)   | 0.00 (0.00-26.93)  | 23.35 (4.81-68.23)  | 0.00 (0.00-61.19)   |
| 30-39              | 0.00 (0.00-15.03)   | 0.00 (0.00-31.01)  | 0.00 (0.00-32.92)   | 0.00 (0.00-104.73)  |
| 40-49              | 4.23 (0.11-23.59)   | 0.00 (0.00-30.51)  | 8.82 (0.22-49.13)   | 0.00 (0.00-92.92)   |
| 50-59              | 5.21 (0.13-29.01)   | 0.00 (0.00-36.80)  | 10.91 (0.28-60.81)  | 0.00 (0.00-104.20)  |
| 60-69              | 13.32 (2.75-38.92)  | 0.00 (0.00-31.92)  | 9.86 (0.25-54.94)   | 44.23 (5.36-159.78) |
| 70-79              | 0.00 (0.00-9.77)    | 0.00 (0.00-20.90)  | 0.00 (0.00-22.76)   | 0.00 (0.00-45.22)   |
| 80+                | 0.00 (0.00-68.7)    | 0.00 (0.00-124.44) | 0.00 (0.00-132.10)  | 0.00 (0.00-280.33)  |
| Age Groups (Years) | Moderna             |                    |                     |                     |
|                    | OE Ratio (95% CI)   |                    |                     |                     |
|                    | All doses           | Dose 1             | Dose 2              | Dose 3              |
| 12-17              | NA                  | NA                 | NA                  | NA                  |
| 18-29              | 8.79 (0.22-48.98)   | 0.00 (0.00-78.82)  | 20.69 (0.52-115.28) | 0.00 (0.00-198.13)  |
| 30-39              | 22.44 (4.63-65.59)  | 0.00 (0.00-89.60)  | 45.30 (5.49-163.65) | 20.68 (0.52-115.24) |
| 40-49              | 0.00 (0.00-27.49)   | 0.00 (0.00-98.04)  | 0.00 (0.00-87.73)   | 0.00 (0.00-67.68)   |
| 50-59              | 8.07 (0.20-44.97)   | 0.00 (0.00-114.96) | 26.25 (0.66-146.23) | 0.00 (0.00-68.68)   |
| 60-69              | 12.93 (1.57-46.71)  | 0.00 (0.00-105.71) | 0.00 (0.00-79.52)   | 27.25 (3.30-98.43)  |
| 70-79              | 4.81 (0.12-26.80)   | 0.00 (0.00-92.35)  | 18.86 (0.48-105.07) | 0.00 (0.00-32.09)   |
| 80+                | 25.81 (0.65-143.81) | 0.00 (0.00-463.01) | 0.00 (0.00-386.02)  | 47.13 (1.19-262.57) |
| 21-DAY RISK WINDOW |                     |                    |                     |                     |
| Age Groups (Years) | Pfizer              |                    |                     |                     |
|                    | OE Ratio (95% CI)   |                    |                     |                     |
|                    | All doses           | Dose 1             | Dose 2              | Dose 3              |
| 12-17              | 8.09 (0.98-29.24)   | 0.00 (0.00-34.47)  | 19.64 (2.38-70.95)  | 0.00 (0.00-105.18)  |
| 18-29              | 4.36 (1.19-11.17)   | 2.43 (0.06-13.56)  | 7.78 (1.60-22.74)   | 0.00 (0.00-20.40)   |
| 30-39              | 4.07 (0.84-11.91)   | 5.61 (0.68-20.25)  | 2.97 (0.08-16.58)   | 0.00 (0.00-34.91)   |
| 40-49              | 2.82 (0.34-10.20)   | 0.00 (0.00-10.17)  | 2.94 (0.07-16.38)   | 8.40 (0.21-46.78)   |
| 50-59              | 5.21 (1.07-15.22)   | 0.00 (0.00-12.27)  | 10.91 (2.25-31.90)  | 0.00 (0.00-34.73)   |
| 60-69              | 7.40 (2.40-17.27)   | 2.88 (0.07-16.07)  | 6.57 (0.80-23.75)   | 14.74 (1.79-53.26)  |
| 70-79              | 0.88 (0.02-4.92)    | 0.00 (0.00-6.97)   | 2.06 (0.05-11.46)   | 0.00 (0.00-15.07)   |
| 80+                | 18.62 (3.84-54.43)  | 11.24 (0.28-62.65) | 11.94 (0.30-66.51)  | 25.33 (0.64-141.13) |
| Age Groups (Years) | Moderna             |                    |                     |                     |
|                    | OE Ratio (95% CI)   |                    |                     |                     |
|                    | All doses           | Dose 1             | Dose 2              | Dose 3              |
| 12-17              | NA                  | NA                 | NA                  | NA                  |
| 18-29              | 5.86 (0.71-21.17)   | 0.00 (0.00-26.27)  | 13.79 (1.67-49.83)  | 0.00 (0.00-66.04)   |
| 30-39              | 9.97 (2.72-25.54)   | 0.00 (0.00-29.87)  | 22.65 (4.67-66.20)  | 6.89 (0.17-38.41)   |
| 40-49              | 0.00 (0.00-9.16)    | 0.00 (0.00-32.68)  | 0.00 (0.00-29.24)   | 0.00 (0.00-22.56)   |
| 50-59              | 2.69 (0.07-14.99)   | 0.00 (0.00-38.32)  | 8.75 (0.22-48.74)   | 0.00 (0.00-22.89)   |
| 60-69              | 6.46 (1.33-18.89)   | 0.00 (0.00-35.24)  | 0.00 (0.00-26.51)   | 13.62 (2.81-39.82)  |
| 70-79              | 3.21 (0.39-11.58)   | 8.35 (0.21-46.50)  | 6.29 (0.16-35.02)   | 0.00 (0.00-10.70)   |
| 80+                | 8.60 (0.22-47.94)   | 0.00 (0.00-154.34) | 0.00 (0.00-128.67)  | 15.71 (0.40-87.52)  |

NA = Not applicable as no doses were administered. OE = observed versus expected.

\*Observed rates of myocarditis were calculated per 100 000 vaccine doses. Expected rates of myocarditis were expressed per 100 000 population.

**Table S3: Descriptive statistics for the post-vaccination myocarditis cases**

| Variable                           | 7-day risk window |              | 21-day risk window |            |
|------------------------------------|-------------------|--------------|--------------------|------------|
|                                    | Male              | Female       | Male               | Female     |
| <b>Number of myocarditis cases</b> | 127               | 52           | 205                | 103        |
| <b>Age</b>                         |                   |              |                    |            |
| Range                              | 12 – 95           | 15 – 90      | 12 – 95            | 15 – 92    |
| Mean (SD)                          | 31 (19.12)        | 46 (21.85)   | 39 (21.52)         | 50 (21.69) |
| Median (IQR)                       | 23 (18-36)        | 49 (26-61.5) | 31 (21-56)         | 53 (30-68) |
| <b>Vaccine type</b>                |                   |              |                    |            |
| <b>Pfizer</b>                      |                   |              |                    |            |
| <i>Dose 1</i>                      | 12                | 6            | 37                 | 21         |
| <i>Dose 2</i>                      | 47                | 18           | 61                 | 34         |
| <i>Dose 3</i>                      | 12                | 4            | 22                 | 12         |
| <b>Moderna</b>                     |                   |              |                    |            |
| <i>Dose 1</i>                      | 5                 | 2            | 14                 | 5          |
| <i>Dose 2</i>                      | 44                | 12           | 55                 | 17         |
| <i>Dose 3</i>                      | 7                 | 10           | 16                 | 14         |

**Table S4: Expected and observed myopericarditis rates with observed vs expected ratios using 7-day risk window**

|                | Observed <sup>1</sup> |               |                           | Expected <sup>2</sup> |            |                           | OE Ratio (95% CI)      |
|----------------|-----------------------|---------------|---------------------------|-----------------------|------------|---------------------------|------------------------|
|                | Number of cases       | Vaccine doses | Rate per 100,000 (95% CI) | Number of cases       | Population | Rate per 100,000 (95% CI) |                        |
| <b>Overall</b> | 179                   | 10253670      | 1.75<br>(1.50-2.02)       | 34.6                  | 5090955    | 0.68<br>(0.48-0.96)       | 5.18<br>(4.45-5.99)    |
| <b>SEX</b>     |                       |               |                           |                       |            |                           |                        |
| Male           | 127                   | 4890010       | 2.6<br>(2.17-3.09)        | 20.5                  | 2571779    | 0.8<br>(0.51-1.25)        | 6.2<br>(5.17-7.38)     |
| Female         | 52                    | 5363660       | 0.97<br>(0.72-1.27)       | 13.8                  | 2519176    | 0.55<br>(0.30-0.93)       | 3.77<br>(2.81-4.94)    |
| <b>AGE</b>     |                       |               |                           |                       |            |                           |                        |
| 12-17          | 27                    | 644677        | 4.19<br>(2.76-6.09)       | 1.0                   | 300573     | 0.33<br>(0.01-1.85)       | 27.35<br>(18.02-39.79) |
| 18-29          | 75                    | 1784793       | 4.2<br>(3.31-5.27)        | 5.9                   | 822028     | 0.71<br>(0.27-1.59)       | 12.77<br>(10.05-16.01) |
| 30-39          | 24                    | 1623945       | 1.48<br>(0.95-2.20)       | 5.4                   | 721055     | 0.75<br>(0.31-1.81)       | 4.45<br>(2.85-6.61)    |
| 40-49          | 7                     | 1340577       | 0.52<br>(0.21-1.08)       | 5.1                   | 647731     | 0.79<br>(0.25-1.80)       | 1.37<br>(0.55-2.82)    |
| 50-59          | 11                    | 1420422       | 0.77<br>(0.39-1.39)       | 5.1                   | 725412     | 0.7<br>(0.22-1.61)        | 2.17<br>(1.08-3.88)    |
| 60-69          | 18                    | 1551893       | 1.16<br>(0.69-1.83)       | 6.7                   | 660685     | 1.02<br>(0.43-2.18)       | 2.68<br>(1.59-4.24)    |
| 70-79          | 9                     | 1227776       | 0.73<br>(0.34-1.39)       | 6.8                   | 413888     | 1.64<br>(0.68-3.49)       | 1.33<br>(0.61-2.52)    |
| 80+            | 8                     | 659587        | 1.21<br>(0.52-2.39)       | 3.4                   | 229260     | 1.49<br>(0.48-4.47)       | 2.34<br>(1.01-4.61)    |
| <b>VACCINE</b> |                       |               |                           |                       |            |                           |                        |
| Pfizer         | 99                    | 6988808       | 1.42<br>(1.15-1.73)       | 23.6                  | 5090955    | 0.46<br>(0.30-0.70)       | 4.20<br>(3.41-5.12)    |
| Moderna        | 80                    | 3264862       | 2.45<br>(1.94-3.05)       | 11.0                  | 5090955    | 0.22<br>(0.11-0.39)       | 7.27<br>(5.76-9.05)    |
| <b>DOSE</b>    |                       |               |                           |                       |            |                           |                        |
| Dose 1         | 25                    | 3993716       | 0.63<br>(0.41-0.92)       | 13.5                  | 5090955    | 0.26<br>(0.15-0.46)       | 1.86<br>(1.2-2.74)     |
| Dose 2         | 121                   | 3884326       | 3.12<br>(2.59-3.72)       | 13.1                  | 5090955    | 0.26<br>(0.14-0.44)       | 9.24<br>(7.67-11.04)   |
| Dose 3         | 33                    | 2375628       | 1.39<br>(0.96-1.95)       | 8.0                   | 5090955    | 0.16<br>(0.07-0.31)       | 4.12<br>(2.84-5.79)    |

<sup>1</sup> Myopericarditis cases recorded 7 days post vaccination between December 15, 2020, and March 31, 2022

<sup>2</sup> The background rates from 2019 were used to calculate the expected numbers

**Table S5: Expected and observed myopericarditis rates with observed vs expected ratios using 21-day risk window**

|                | Observed <sup>1</sup> |               |                           | Expected <sup>2</sup> |            |                           | OE Ratio<br>(95% CI) |
|----------------|-----------------------|---------------|---------------------------|-----------------------|------------|---------------------------|----------------------|
|                | Number of cases       | Vaccine doses | Rate per 100,000 (95% CI) | Number of cases       | Population | Rate per 100,000 (95% CI) |                      |
| <b>Overall</b> | 308                   | 10253670      | 3.00<br>(2.68-3.36)       | 103.7                 | 5090955    | 2.04<br>(1.67-2.48)       | 2.97<br>(2.65-3.32)  |
| <b>SEX</b>     |                       |               |                           |                       |            |                           |                      |
| Male           | 205                   | 4890010       | 4.19<br>(3.64-4.81)       | 61.4                  | 2571779    | 2.39<br>(1.85-3.09)       | 3.34<br>(2.9-3.83)   |
| Female         | 103                   | 5363660       | 1.92<br>(1.57-2.33)       | 41.4                  | 2519176    | 1.64<br>(1.20-2.25)       | 2.49<br>(2.03-3.02)  |
| <b>AGE</b>     |                       |               |                           |                       |            |                           |                      |
| 12-17          | 32                    | 644677        | 4.96<br>(3.40-7.01)       | 3.0                   | 300573     | 0.99<br>(0.21-2.92)       | 10.8<br>(7.39-15.25) |
| 18-29          | 95                    | 1784793       | 5.32<br>(4.31-6.51)       | 17.6                  | 822028     | 2.14<br>(1.30-3.46)       | 5.39<br>(4.36-6.59)  |
| 30-39          | 47                    | 1623945       | 2.89<br>(2.13-3.85)       | 16.2                  | 721055     | 2.25<br>(1.27-3.60)       | 2.90<br>(2.13-3.86)  |
| 40-49          | 17                    | 1340577       | 1.27<br>(0.74-2.03)       | 15.4                  | 647731     | 2.37<br>(1.41-4.01)       | 1.11<br>(0.64-1.77)  |
| 50-59          | 31                    | 1420422       | 2.18<br>(1.48-3.10)       | 15.2                  | 725412     | 2.1<br>(1.26-3.58)        | 2.04<br>(1.38-2.89)  |
| 60-69          | 41                    | 1551893       | 2.64<br>(1.90-3.58)       | 20.1                  | 660685     | 3.05<br>(1.85-4.68)       | 2.04<br>(1.46-2.76)  |
| 70-79          | 25                    | 1227776       | 2.04<br>(1.32-3.01)       | 20.3                  | 413888     | 4.91<br>(3.14-7.76)       | 1.23<br>(0.80-1.82)  |
| 80+            | 20                    | 659587        | 3.03<br>(1.85-4.68)       | 10.3                  | 229260     | 4.48<br>(2.40-8.59)       | 1.95<br>(1.19-3.01)  |
| <b>VACCINE</b> |                       |               |                           |                       |            |                           |                      |
| Pfizer         | 187                   | 6988808       | 2.68<br>(2.31-3.09)       | 70.7                  | 5090955    | 1.39<br>(1.09-1.76)       | 2.65<br>(2.28-3.05)  |
| Moderna        | 121                   | 3264862       | 3.71<br>(3.08-4.43)       | 33.0                  | 5090955    | 0.65<br>(0.45-0.91)       | 3.66<br>(3.04-4.38)  |
| <b>GENDER</b>  |                       |               |                           |                       |            |                           |                      |
| Dose 1         | 77                    | 3993716       | 1.93<br>(1.52-2.41)       | 40.4                  | 5090955    | 0.79<br>(0.58-1.09)       | 1.91<br>(1.5-2.38)   |
| Dose 2         | 167                   | 3884326       | 4.3<br>(3.67-5.00)        | 39.3                  | 5090955    | 0.77<br>(0.56-1.07)       | 4.25<br>(3.63-4.95)  |
| Dose 3         | 64                    | 2375628       | 2.69<br>(2.08-3.44)       | 24.0                  | 5090955    | 0.47<br>(0.30-0.70)       | 2.66<br>(2.05-3.4)   |

<sup>1</sup> Myopericarditis cases recorded 21 days post vaccination between December 15, 2020, and March 31, 2022

<sup>2</sup> The background rates from 2019 were used to calculate the expected numbers

**Table S6: Myopericarditis rates following mRNA COVID-19 vaccination using 7-day and 21-day risk windows by vaccine type, sex, and age, in British Columbia\***

| 7-DAY RISK WINDOW  |                                        |                  |                 |                |                |                |
|--------------------|----------------------------------------|------------------|-----------------|----------------|----------------|----------------|
| Age Groups (Years) | Pfizer<br>Rate/100,000 doses (95% CI)  |                  |                 |                |                |                |
|                    | Male                                   |                  |                 | Female         |                |                |
|                    | Dose 1                                 | Dose 2           | Dose 3          | Dose 1         | Dose 2         | Dose 3         |
| 12-17              | 2.8 (0.8-7.3)                          | 9.0 (4.6-15.7)   | 11.7 (3.8-27.3) | 0.7 (0.0-4.1)  | 3.1 (0.8-7.8)  | 0.0 (0.0-8.2)  |
| 18-29              | 1.1 (0.2-3.2)                          | 7.8 (4.8-12.0)   | 4.0 (1.1-10.2)  | 0.0 (0.0-1.3)  | 2.6 (1.1-5.4)  | 0.0 (0.0-3.0)  |
| 30-39              | 0.4 (0.0-2.4)                          | 1.8 (0.5-4.7)    | 1.6 (0.0-9.1)   | 0.0 (0.0-1.5)  | 0.9 (0.1-3.1)  | 0.0 (0.0-5.0)  |
| 40-49              | 0.0 (0.0-2.0)                          | 1.2 (0.1-4.2)    | 1.9 (0.0-10.3)  | 0.0 (0.0-1.8)  | 1.0 (0.1-3.7)  | 0.0 (0.0-5.4)  |
| 50-59              | 0.0 (0.0-2.0)                          | 1.8 (0.4-5.2)    | 0.0 (0.0-6.0)   | 0.5 (0.0-2.6)  | 0.5 (0.0-2.8)  | 1.3 (0.0-7.3)  |
| 60-69              | 1.5 (0.3-4.4)                          | 0.6 (0.0-3.2)    | 1.3 (0.0-7.4)   | 1.3 (0.3-3.8)  | 0.5 (0.0-2.8)  | 2.2 (0.3-8.1)  |
| 70-79              | 0.6 (0.0-3.4)                          | 2.0 (0.4-5.9)    | 0.0 (0.0-5.0)   | 0.0 (0.0-2.0)  | 0.6 (0.0-3.4)  | 0.0 (0.0-4.4)  |
| 80+                | 0.0 (0.0-4.8)                          | 2.8 (0.3-10.0)   | 0.0 (0.0-10.3)  | 1.0 (0.5-5.0)  | 0.0 (0.0-3.8)  | 2.2 (0.1-12.3) |
| Age Groups (Years) | Moderna<br>Rate/100,000 doses (95% CI) |                  |                 |                |                |                |
|                    | Male                                   |                  |                 | Female         |                |                |
|                    | Dose 1                                 | Dose 2           | Dose 3          | Dose 1         | Dose 2         | Dose 3         |
| 12-17              | NA                                     | NA               | NA              | NA             | NA             | NA             |
| 18-29              | 2.7 (0.6-7.9)                          | 30.3 (20.9-42.6) | 4.0 (0.1-22.0)  | 0.0 (0.0-3.8)  | 3.0 (0.6-8.8)  | 2.6 (0.1-14.5) |
| 30-39              | 0.0 (0.0-3.8)                          | 8.0 (3.4-15.7)   | 2.3 (0.3-8.4)   | 0.0 (0.0-4.3)  | 4.4 (1.2-11.2) | 2.0 (0.2-7.2)  |
| 40-49              | 0.0 (0.0-5.2)                          | 2.6 (0.3-9.5)    | 0.0 (0.0-4.6)   | 0.0 (0.0-5.7)  | 0.0 (0.0-5.1)  | 0.0 (0.0-3.9)  |
| 50-59              | 1.4 (0.0-7.8)                          | 0.0 (0.0-4.5)    | 0.0 (0.0-3.8)   | 1.4 (0.0-8.1)  | 2.4 (0.3-8.8)  | 0.9 (0.0-4.8)  |
| 60-69              | 0.0 (0.0-5.5)                          | 0.0 (0.0-4.2)    | 0.8 (0.0-4.4)   | 0.0 (0.0-5.3)  | 1.1 (0.0-6.1)  | 3.4 (1.1-8.0)  |
| 70-79              | 0.0 (0.0-9.1)                          | 1.9 (0.0-10.5)   | 1.8 (0.2-6.6)   | 0.0 (0.0-9.1)  | 1.8 (0.0-10.3) | 0.0 (0.0-3.1)  |
| 80+                | 5.0 (0.1-27.7)                         | 0.0 (0.0-14.9)   | 0.0 (0.0-6.8)   | 3.7 (0.1-20.3) | 3.0 (0.1-17.0) | 1.4 (0.0-7.6)  |
| 21-DAY RISK WINDOW |                                        |                  |                 |                |                |                |
| Age Groups (Years) | Pfizer<br>Rate/100,000 doses (95% CI)  |                  |                 |                |                |                |
|                    | Male                                   |                  |                 | Female         |                |                |
|                    | Dose 1                                 | Dose 2           | Dose 3          | Dose 1         | Dose 2         | Dose 3         |
| 12-17              | 3.6 (1.2-8.3)                          | 9.0 (4.6-15.7)   | 14.0 (5.1-30.5) | 2.2 (0.5-6.4)  | 3.1 (0.8-7.8)  | 2.2 (0.1-12.4) |
| 18-29              | 2.6 (1.0-5.3)                          | 9.3 (6.0-13.9)   | 6.0 (2.2-13.0)  | 0.4 (0.0-2.0)  | 3.0 (1.3-5.9)  | 0.8 (0.0-4.5)  |
| 30-39              | 3.4 (1.5-6.8)                          | 2.8 (1.0-6.0)    | 3.3 (0.4-11.8)  | 1.2 (0.3-3.5)  | 1.7 (0.5-4.4)  | 1.4 (0.0-7.6)  |
| 40-49              | 1.6 (0.3-4.8)                          | 1.8 (0.4-5.1)    | 1.9 (0.0-10.3)  | 1.0 (0.1-3.5)  | 1.0 (0.1-3.7)  | 1.5 (0.0-8.1)  |
| 50-59              | 2.2 (0.6-5.5)                          | 2.4 (0.7-6.1)    | 3.3 (0.4-11.8)  | 0.5 (0.0-2.6)  | 2.5 (0.8-5.9)  | 1.3 (0.0-7.3)  |
| 60-69              | 2.5 (0.8-5.9)                          | 2.3 (0.6-6.0)    | 6.6 (2.2-15.5)  | 2.6 (1.0-5.7)  | 2.0 (0.5-5.1)  | 4.5 (1.2-11.4) |
| 70-79              | 1.2 (0.1-4.4)                          | 3.4 (1.1-7.9)    | 0.0 (0.0-5.0)   | 1.7 (0.3-4.9)  | 3.6 (1.3-7.9)  | 0.0 (0.0-4.4)  |
| 80+                | 3.9 (0.8-11.4)                         | 4.2 (0.9-12.2)   | 0.0 (0.0-10.3)  | 2.0 (0.2-7.1)  | 1.0 (0.0-5.8)  | 6.6 (1.4-19.4) |
| Age Groups (Years) | Moderna<br>Rate/100,000 doses (95% CI) |                  |                 |                |                |                |
|                    | Male                                   |                  |                 | Female         |                |                |
|                    | Dose 1                                 | Dose 2           | Dose 3          | Dose 1         | Dose 2         | Dose 3         |
| 12-17              | NA                                     | NA               | NA              | NA             | NA             | NA             |
| 18-29              | 4.5 (1.5-10.5)                         | 32.2 (22.4-44.7) | 7.9 (1.0-28.6)  | 0.0 (0.0-3.8)  | 5.0 (1.6-11.7) | 2.6 (0.1-14.5) |
| 30-39              | 1.0 (0.0-5.8)                          | 11.0 (5.5-19.6)  | 3.5 (0.7-10.2)  | 0.0 (0.0-4.3)  | 6.5 (2.4-14.2) | 2.0 (0.2-7.2)  |
| 40-49              | 1.4 (0.0-7.9)                          | 3.9 (0.8-11.5)   | 0.0 (0.0-4.6)   | 0.0 (0.0-5.7)  | 1.4 (0.0-7.7)  | 0.0 (0.0-3.9)  |
| 50-59              | 5.6 (1.5-14.4)                         | 1.2 (0.0-6.8)    | 2.0 (0.2-7.4)   | 2.9 (0.4-10.5) | 2.4 (0.3-8.8)  | 2.6 (0.5-7.6)  |
| 60-69              | 1.5 (0.0-8.3)                          | 1.1 (0.0-6.4)    | 2.4 (0.5-6.9)   | 0.0 (0.0-5.3)  | 1.1 (0.0-6.1)  | 4.8 (1.9-9.9)  |
| 70-79              | 2.5 (0.1-13.8)                         | 5.6 (1.2-16.5)   | 2.7 (0.6-8.0)   | 2.5 (0.1-13.7) | 1.8 (0.0-10.3) | 0.0 (0.0-3.1)  |
| 80+                | 5.0 (0.1-27.7)                         | 4.0 (0.1-22.5)   | 3.7 (0.4-13.4)  | 7.3 (0.9-26.4) | 3.0 (0.1-17.0) | 1.4 (0.0-7.6)  |

NA = Not applicable as no doses were administered. OE = observed versus expected.

\*Rates of myopericarditis were calculated per 100,000 vaccine doses.



**Table S7: Ratio of observed versus expected rates of myopericarditis among males following mRNA Covid-19 vaccination in British Columbia\***

| 7-DAY RISK WINDOW  |                              |                    |                     |                      |
|--------------------|------------------------------|--------------------|---------------------|----------------------|
| Age Groups (Years) | Pfizer<br>OE Ratio (95% CI)  |                    |                     |                      |
|                    | All doses                    | Dose 1             | Dose 2              | Dose 3               |
| 12-17              | 35.69 (22.09-54.55)          | 15.13 (4.12-38.74) | 47.75 (24.67-83.41) | 62.13 (20.17-145.00) |
| 18-29              | 8.81 (5.81-12.82)            | 2.40 (0.50-7.02)   | 17.12 (10.45-26.43) | 8.72 (2.38-22.33)    |
| 30-39              | 2.38 (0.87-5.18)             | 0.95 (0.02-5.27)   | 4.05 (1.10-10.38)   | 3.58 (0.09-19.94)    |
| 40-49              | 1.30 (0.27-3.81)             | 0.00 (0.00-4.13)   | 2.41 (0.29-8.72)    | 3.83 (0.10-21.32)    |
| 50-59              | 1.45 (0.30-4.23)             | 0.00 (0.00-4.71)   | 4.24 (0.87-12.40)   | 0.00 (0.00-14.23)    |
| 60-69              | 1.74 (0.57-4.07)             | 2.73 (0.56-7.97)   | 1.05 (0.03-5.86)    | 2.40 (0.06-13.40)    |
| 70-79              | 1.56 (0.43-4.00)             | 1.03 (0.03-5.74)   | 3.39 (0.70-9.90)    | 0.00 (0.00-8.27)     |
| 80+                | 1.27 (0.15-4.57)             | 0.00 (0.00-7.40)   | 4.27 (0.52-15.43)   | 0.00 (0.00-15.87)    |
| Age Groups (Years) | Moderna<br>OE Ratio (95% CI) |                    |                     |                      |
|                    | All doses                    | Dose 1             | Dose 2              | Dose 3               |
| 12-17              | NA                           | NA                 | NA                  | NA                   |
| 18-29              | 33.22 (23.39-45.79)          | 5.96 (1.23-17.41)  | 66.64 (45.87-93.58) | 8.69 (0.22-48.39)    |
| 30-39              | 7.77 (3.72-14.28)            | 0.00 (0.00-8.39)   | 17.54 (7.57-34.56)  | 5.11 (0.62-18.45)    |
| 40-49              | 1.82 (0.22-6.57)             | 0.00 (0.00-10.74)  | 5.42 (0.66-19.59)   | 0.00 (0.00-9.53)     |
| 50-59              | 0.94 (0.02-5.25)             | 3.33 (0.08-18.55)  | 0.00 (0.00-10.65)   | 0.00 (0.00-8.92)     |
| 60-69              | 0.64 (0.02-3.58)             | 0.00 (0.00-9.97)   | 0.00 (0.00-7.60)    | 1.43 (0.04-7.96)     |
| 70-79              | 2.47 (0.51-7.23)             | 0.00 (0.00-15.27)  | 3.14 (0.08-17.50)   | 3.06 (0.37-11.07)    |
| 80+                | 1.56 (0.04-8.68)             | 7.64 (0.19-42.56)  | 0.00 (0.00-22.89)   | 0.00 (0.00-10.54)    |
| 21-DAY RISK WINDOW |                              |                    |                     |                      |
| Age Groups (Years) | Pfizer<br>OE Ratio (95% CI)  |                    |                     |                      |
|                    | All doses                    | Dose 1             | Dose 2              | Dose 3               |
| 12-17              | 13.03 (8.26-19.55)           | 6.31 (2.05-14.71)  | 15.92 (8.22-27.80)  | 24.85 (9.12-54.09)   |
| 18-29              | 4.03 (2.99-5.73)             | 1.87 (0.75-3.85)   | 6.85 (4.39-10.19)   | 4.36 (1.60-9.49)     |
| 30-39              | 2.12 (1.29-3.51)             | 2.52 (1.09-4.97)   | 2.03 (0.74-4.41)    | 2.39 (0.29-8.62)     |
| 40-49              | 1.01 (0.66-2.57)             | 1.12 (0.23-3.27)   | 1.21 (0.25-3.53)    | 1.28 (0.03-7.11)     |
| 50-59              | 1.61 (0.86-3.09)             | 1.70 (0.46-4.36)   | 1.89 (0.51-4.83)    | 2.57 (0.31-9.29)     |
| 60-69              | 1.63 (0.99-2.89)             | 1.52 (0.49-3.54)   | 1.40 (0.38-3.59)    | 4.01 (1.30-9.35)     |
| 70-79              | 0.91 (0.40-1.90)             | 0.69 (0.08-2.48)   | 1.88 (0.61-4.39)    | 0.00 (0.00-2.76)     |
| 80+                | 1.27 (0.60-3.27)             | 2.01 (0.41-5.86)   | 2.14 (0.44-6.24)    | 0.00 (0.00-5.29)     |
| Age Groups (Years) | Moderna<br>OE Ratio (95% CI) |                    |                     |                      |
|                    | All doses                    | Dose 1             | Dose 2              | Dose 3               |
| 12-17              | NA                           | NA                 | NA                  | NA                   |
| 18-29              | 12.57 (9.06-16.99)           | 3.31 (1.07-7.73)   | 23.56 (16.41-32.76) | 5.79 (0.7-20.92)     |
| 30-39              | 3.88 (2.17-6.41)             | 0.76 (0.02-4.22)   | 8.04 (4.01-14.39)   | 2.55 (0.53-7.46)     |
| 40-49              | 1.21 (0.33-3.11)             | 0.97 (0.02-5.41)   | 2.71 (0.56-7.93)    | 0.00 (0.00-3.18)     |
| 50-59              | 2.20 (0.88-4.53)             | 4.44 (1.21-11.37)  | 0.96 (0.02-5.36)    | 1.61 (0.20-5.82)     |
| 60-69              | 1.07 (0.35-2.50)             | 0.90 (0.02-5.02)   | 0.69 (0.02-3.83)    | 1.43 (0.29-4.17)     |
| 70-79              | 1.92 (0.77-3.96)             | 1.38 (0.03-7.69)   | 3.14 (0.65-9.18)    | 1.53 (0.32-4.48)     |
| 80+                | 2.08 (0.57-5.32)             | 2.55 (0.06-14.19)  | 2.07 (0.05-11.52)   | 1.90 (0.23-6.88)     |

NA = Not applicable as no doses were administered. OE = observed versus expected.

\*Observed rates of myopericarditis were calculated per 100 000 vaccine doses. Expected rates of myopericarditis were expressed per 100 000 population.

**Table S8: Ratio of observed versus expected rates of myopericarditis among females following mRNA Covid-19 vaccination in British Columbia\***

| 7-DAY RISK WINDOW  |                              |                    |                    |                    |
|--------------------|------------------------------|--------------------|--------------------|--------------------|
| Age Groups (Years) | Pfizer<br>OE Ratio (95% CI)  |                    |                    |                    |
|                    | All doses                    | Dose 1             | Dose 2             | Dose 3             |
|                    | 12-17                        | 13.49 (4.38-31.48) | 6.23 (0.16-34.71)  | 26.19 (7.14-67.05) |
| 18-29              | 5.73 (2.30-11.80)            | 0.00 (0.00-6.73)   | 13.62 (5.48-28.06) | 0.00 (0.00-15.30)  |
| 30-39              | 1.88 (0.23-6.79)             | 0.00 (0.00-7.16)   | 4.12 (0.50-14.88)  | 0.00 (0.00-24.17)  |
| 40-49              | 1.73 (0.21-6.24)             | 0.00 (0.00-6.23)   | 3.60 (0.44-13.00)  | 0.00 (0.00-18.96)  |
| 50-59              | 2.47 (0.51-7.21)             | 1.57 (0.04-8.78)   | 1.72 (0.04-9.60)   | 4.46 (0.11-24.85)  |
| 60-69              | 4.21 (1.54-9.15)             | 4.10 (0.85-11.98)  | 1.56 (0.04-8.68)   | 6.98 (0.85-25.23)  |
| 70-79              | 0.51 (0.01-2.85)             | 0.00 (0.00-4.03)   | 1.19 (0.03-6.63)   | 0.00 (0.00-8.73)   |
| 80+                | 2.57 (0.31-9.28)             | 2.33 (0.06-12.96)  | 0.00 (0.00-9.11)   | 5.24 (0.13-29.20)  |
| Age Groups (Years) | Moderna<br>OE Ratio (95% CI) |                    |                    |                    |
|                    | All doses                    | Dose 1             | Dose 2             | Dose 3             |
|                    | 12-17                        | NA                 | NA                 | NA                 |
| 18-29              | 8.79 (2.40-22.51)            | 0.00 (0.00-19.71)  | 15.52 (3.20-45.35) | 13.43 (0.34-74.81) |
| 30-39              | 10.36 (3.80-22.55)           | 0.00 (0.00-20.68)  | 20.91 (5.70-53.53) | 9.55 (1.16-34.48)  |
| 40-49              | 0.00 (0.00-5.61)             | 0.00 (0.00-20.01)  | 0.00 (0.00-17.9)   | 0.00 (0.00-13.81)  |
| 50-59              | 5.10 (1.39-13.05)            | 4.92 (0.12-27.42)  | 8.29 (1.00-29.94)  | 2.94 (0.07-16.38)  |
| 60-69              | 6.12 (2.25-13.33)            | 0.00 (0.00-16.69)  | 3.40 (0.09-18.96)  | 10.76 (3.49-25.10) |
| 70-79              | 0.93 (0.02-5.17)             | 0.00 (0.00-17.82)  | 3.64 (0.09-20.28)  | 0.00 (0.00-6.19)   |
| 80+                | 5.34 (1.10-15.61)            | 8.66 (0.22-48.23)  | 7.22 (0.18-40.21)  | 3.25 (0.08-18.11)  |
| 21-DAY RISK WINDOW |                              |                    |                    |                    |
| Age Groups (Years) | Pfizer<br>OE Ratio (95% CI)  |                    |                    |                    |
|                    | All doses                    | Dose 1             | Dose 2             | Dose 3             |
|                    | 12-17                        | 7.19 (3.11-14.18)  | 6.23 (1.28-18.21)  | 8.73 (2.38-22.35)  |
| 18-29              | 2.73 (1.31-5.01)             | 0.61 (0.02-3.39)   | 5.19 (2.24-10.22)  | 1.38 (0.03-7.70)   |
| 30-39              | 2.51 (1.08-4.94)             | 1.94 (0.40-5.67)   | 2.75 (0.75-7.03)   | 2.18 (0.06-12.17)  |
| 40-49              | 1.44 (0.47-3.36)             | 1.13 (0.14-4.06)   | 1.20 (0.15-4.33)   | 1.71 (0.04-9.55)   |
| 50-59              | 1.92 (0.77-3.95)             | 0.52 (0.01-2.93)   | 2.87 (0.93-6.70)   | 1.49 (0.04-8.28)   |
| 60-69              | 3.27 (1.79-5.49)             | 2.73 (1.00-5.95)   | 2.08 (0.57-5.32)   | 4.66 (1.27-11.92)  |
| 70-79              | 1.53 (0.70-2.91)             | 1.09 (0.23-3.19)   | 2.38 (0.87-5.18)   | 0.00 (0.00-2.91)   |
| 80+                | 2.57 (0.94-5.59)             | 1.55 (0.19-5.60)   | 0.82 (0.02-4.59)   | 5.24 (1.08-15.32)  |
| Age Groups (Years) | Moderna<br>OE Ratio (95% CI) |                    |                    |                    |
|                    | All doses                    | Dose 1             | Dose 2             | Dose 3             |
|                    | 12-17                        | NA                 | NA                 | NA                 |
| 18-29              | 4.40 (1.61-9.57)             | 0.00 (0.00-6.57)   | 8.62 (2.80-20.12)  | 4.48 (0.11-24.94)  |
| 30-39              | 4.60 (1.99-9.07)             | 0.00 (0.00-6.89)   | 10.45 (3.84-22.75) | 3.18 (0.39-11.49)  |
| 40-49              | 0.51 (0.01-2.82)             | 0.00 (0.00-6.67)   | 1.62 (0.04-9.01)   | 0.00 (0.00-4.60)   |
| 50-59              | 2.97 (1.20-6.13)             | 3.28 (0.40-11.85)  | 2.76 (0.33-9.98)   | 2.94 (0.61-8.59)   |
| 60-69              | 2.72 (1.18-5.36)             | 0.00 (0.00-5.56)   | 1.13 (0.03-6.32)   | 5.02 (2.02-10.34)  |
| 70-79              | 0.62 (0.07-2.24)             | 1.61 (0.04-8.97)   | 1.21 (0.03-6.76)   | 0.00 (0.00-2.06)   |
| 80+                | 2.37 (0.65-6.08)             | 5.77 (0.70-20.85)  | 2.41 (0.06-13.40)  | 1.08 (0.03-6.04)   |

NA = Not applicable as no doses were administered. OE = observed versus expected.

\*Observed rates of myopericarditis were calculated per 100 000 vaccine doses. Expected rates of myopericarditis were expressed per 100 000 population.

**Table S9: Number of doses, observed, and expected numbers of myocarditis cases among males following mRNA Covid-19 vaccination, British Columbia**

| 7-DAY RISK WINDOW  |        |              |      |        |                |      |        |              |      |
|--------------------|--------|--------------|------|--------|----------------|------|--------|--------------|------|
| Age Groups (Years) | Pfizer |              |      |        |                |      |        |              |      |
|                    | Dose1  |              |      | Dose2  |                |      | Dose3  |              |      |
|                    | No.    | Obs (95%CI)  | Exp  | No.    | Obs (95%CI)    | Exp  | No.    | Obs (95%CI)  | Exp  |
| 12-17              | 140557 | 3 (0.6-8.8)  | 0.07 | 133633 | 9 (4.1-17.1)   | 0.07 | 42791  | 3 (0.6-8.8)  | 0.02 |
| 18-29              | 274238 | 1 (0-5.6)    | 0.41 | 256767 | 13 (6.9-22.2)  | 0.38 | 100783 | 3 (0.6-8.8)  | 0.15 |
| 30-39              | 232061 | 1 (0-5.6)    | 0.32 | 216725 | 1 (0-5.6)      | 0.30 | 61389  | 1 (0-5.6)    | 0.08 |
| 40-49              | 183934 | 0 (0-3.7)    | 0.13 | 170626 | 1 (0-5.6)      | 0.12 | 53848  | 1 (0-5.6)    | 0.04 |
| 50-59              | 185172 | 0 (0-3.7)    | 0.11 | 167180 | 2 (0.2-7.2)    | 0.10 | 61289  | 0 (0-3.7)    | 0.04 |
| 60-69              | 198794 | 0 (0-3.7)    | 0.10 | 171902 | 1 (0-5.6)      | 0.08 | 75198  | 0 (0-3.7)    | 0.04 |
| 70-79              | 162393 | 0 (0-3.7)    | 0.13 | 148009 | 0 (0-3.7)      | 0.11 | 74518  | 0 (0-3.7)    | 0.06 |
| 80+                | 76756  | 0 (0-3.7)    | 0.06 | 72050  | 2 (0.2-7.2)    | 0.06 | 35770  | 0 (0-3.7)    | 0.03 |
| Moderna            |        |              |      |        |                |      |        |              |      |
| Age Groups (Years) | Dose 1 |              |      | Dose 2 |                |      | Dose 3 |              |      |
|                    | No.    | Obs (95%CI)  | Exp  | No.    | Obs (95%CI)    | Exp  | No.    | Obs (95%CI)  | Exp  |
|                    | 12-17  | NA           | NA   | NA     | NA             | NA   | NA     | NA           | NA   |
| 18-29              | 110631 | 1 (0-5.6)    | 0.16 | 108820 | 24 (15.4-35.7) | 0.16 | 25300  | 1 (0-5.6)    | 0.04 |
| 30-39              | 96605  | 0 (0-3.7)    | 0.13 | 100185 | 7 (2.8-14.4)   | 0.14 | 86027  | 1 (0-5.6)    | 0.12 |
| 40-49              | 70735  | 0 (0-3.7)    | 0.05 | 75966  | 1 (0-5.6)      | 0.06 | 79704  | 0 (0-3.7)    | 0.06 |
| 50-59              | 71013  | 1 (0-5.6)    | 0.04 | 81891  | 0 (0-3.7)      | 0.05 | 97756  | 0 (0-3.7)    | 0.06 |
| 60-69              | 66889  | 0 (0-3.7)    | 0.03 | 87711  | 0 (0-3.7)      | 0.04 | 126623 | 0 (0-3.7)    | 0.06 |
| 70-79              | 40384  | 0 (0-3.7)    | 0.03 | 53204  | 0 (0-3.7)      | 0.04 | 109122 | 2 (0.2-7.2)  | 0.08 |
| 80+                | 20148  | 0 (0-3.7)    | 0.02 | 24807  | 0 (0-3.7)      | 0.02 | 53882  | 0 (0-3.7)    | 0.04 |
| 21-DAY RISK WINDOW |        |              |      |        |                |      |        |              |      |
| Age Groups (Years) | Pfizer |              |      |        |                |      |        |              |      |
|                    | Dose 1 |              |      | Dose 2 |                |      | Dose 3 |              |      |
|                    | No.    | Obs (95%CI)  | Exp  | No.    | Obs (95%CI)    | Exp  | No.    | Obs (95%CI)  | Exp  |
| 12-17              | 140557 | 4 (1.1-10.2) | 0.21 | 133633 | 9 (4.1-17.1)   | 0.20 | 42791  | 4 (1.1-10.2) | 0.06 |
| 18-29              | 274238 | 2 (0.2-7.2)  | 1.22 | 256767 | 15 (8.4-24.7)  | 1.15 | 100783 | 3 (0.6-8.8)  | 0.45 |
| 30-39              | 232061 | 6 (2.2-13.1) | 0.96 | 216725 | 3 (0.6-8.8)    | 0.89 | 61389  | 2 (0.2-7.2)  | 0.25 |
| 40-49              | 183934 | 1 (0-5.6)    | 0.40 | 170626 | 2 (0.2-7.2)    | 0.37 | 53848  | 1 (0-5.6)    | 0.12 |
| 50-59              | 185172 | 2 (0.2-7.2)  | 0.33 | 167180 | 2 (0.2-7.2)    | 0.30 | 61289  | 1 (0-5.6)    | 0.11 |
| 60-69              | 198794 | 0 (0-3.7)    | 0.29 | 171902 | 1 (0-5.6)      | 0.25 | 75198  | 1 (0-5.6)    | 0.11 |
| 70-79              | 162393 | 0 (0-3.7)    | 0.38 | 148009 | 0 (0-3.7)      | 0.34 | 74518  | 0 (0-3.7)    | 0.17 |
| 80+                | 76756  | 0 (0-3.7)    | 0.18 | 72050  | 2 (0.2-7.2)    | 0.17 | 35770  | 0 (0-3.7)    | 0.08 |
| Moderna            |        |              |      |        |                |      |        |              |      |
| Age Groups (Years) | Dose 1 |              |      | Dose 2 |                |      | Dose 3 |              |      |
|                    | No.    | Obs (95%CI)  | Exp  | No.    | Obs (95%CI)    | Exp  | No.    | Obs (95%CI)  | Exp  |
|                    | 12-17  | NA           | NA   | NA     | NA             | NA   | NA     | NA           | NA   |
| 18-29              | 110631 | 1 (0-5.6)    | 0.49 | 108820 | 25 (16.2-36.9) | 0.49 | 25300  | 1 (0-5.6)    | 0.11 |
| 30-39              | 96605  | 2 (0.2-7.2)  | 0.40 | 100185 | 7 (2.8-14.4)   | 0.41 | 86027  | 1 (0-5.6)    | 0.36 |
| 40-49              | 70735  | 0 (0-3.7)    | 0.15 | 75966  | 1 (0-5.6)      | 0.17 | 79704  | 0 (0-3.7)    | 0.17 |
| 50-59              | 71013  | 2 (0.2-7.2)  | 0.13 | 81891  | 0 (0-3.7)      | 0.15 | 97756  | 0 (0-3.7)    | 0.17 |
| 60-69              | 66889  | 0 (0-3.7)    | 0.10 | 87711  | 0 (0-3.7)      | 0.13 | 126623 | 1 (0-5.6)    | 0.18 |
| 70-79              | 40384  | 0 (0-3.7)    | 0.09 | 53204  | 0 (0-3.7)      | 0.12 | 109122 | 2 (0.2-7.2)  | 0.25 |
| 80+                | 20148  | 0 (0-3.7)    | 0.05 | 24807  | 0 (0-3.7)      | 0.06 | 53882  | 1 (0-5.6)    | 0.13 |

No. = Number

Obs = Observed

Exp = Expected

NA = Not applicable as doses were administered

**Table S10: Number of doses, observed, and expected numbers of myocarditis cases among females following mRNA Covid-19 vaccination, British Columbia**

| 7-DAY RISK WINDOW  |         |             |      |        |             |      |        |             |      |
|--------------------|---------|-------------|------|--------|-------------|------|--------|-------------|------|
| Age Groups (Years) | Pfizer  |             |      |        |             |      |        |             |      |
|                    | Dose1   |             |      | Dose2  |             |      | Dose3  |             |      |
|                    | No.     | Obs (95%CI) | Exp  | No.    | Obs (95%CI) | Exp  | No.    | Obs (95%CI) | Exp  |
| 12-17              | 137281  | 0 (0-3.7)   | 0.04 | 130628 | 2 (0.2-7.2) | 0.03 | 44991  | 0 (0-3.7)   | 0.01 |
| 18-29              | 283089  | 0 (0-3.7)   | 0.14 | 265600 | 3 (0.6-8.8) | 0.13 | 124611 | 0 (0-3.7)   | 0.06 |
| 30-39              | 247214  | 0 (0-3.7)   | 0.12 | 232886 | 0 (0-3.7)   | 0.11 | 73207  | 0 (0-3.7)   | 0.04 |
| 40-49              | 209114  | 0 (0-3.7)   | 0.12 | 196125 | 1 (0-5.6)   | 0.11 | 68654  | 0 (0-3.7)   | 0.04 |
| 50-59              | 215932  | 0 (0-3.7)   | 0.10 | 197347 | 1 (0-5.6)   | 0.09 | 76252  | 0 (0-3.7)   | 0.04 |
| 60-69              | 228753  | 0 (0-3.7)   | 0.12 | 200719 | 1 (0-5.6)   | 0.10 | 89502  | 2 (0.2-7.2) | 0.05 |
| 70-79              | 180032  | 0 (0-3.7)   | 0.18 | 165274 | 0 (0-3.7)   | 0.16 | 83199  | 0 (0-3.7)   | 0.08 |
| 80+                | 101901  | 0 (0-3.7)   | 0.03 | 95991  | 0 (0-3.7)   | 0.03 | 45236  | 0 (0-3.7)   | 0.01 |
| Moderna            |         |             |      |        |             |      |        |             |      |
| Age Groups (Years) | Dose 1  |             |      | Dose 2 |             |      | Dose 3 |             |      |
|                    | No.     | Obs (95%CI) | Exp  | No.    | Obs (95%CI) | Exp  | No.    | Obs (95%CI) | Exp  |
|                    | 12-17   | NA          | NA   | NA     | NA          | NA   | NA     | NA          | NA   |
| 18-29              | 96733   | 0 (0-3.7)   | 0.05 | 99895  | 1 (0-5.6)   | 0.05 | 38483  | 0 (0-3.7)   | 0.02 |
| 30-39              | 85577   | 0 (0-3.7)   | 0.04 | 91762  | 2 (0.2-7.2) | 0.04 | 100495 | 1 (0-5.6)   | 0.05 |
| 40-49              | 65072   | 0 (0-3.7)   | 0.04 | 72715  | 0 (0-3.7)   | 0.04 | 94253  | 0 (0-3.7)   | 0.05 |
| 50-59              | 69115   | 0 (0-3.7)   | 0.03 | 82065  | 1 (0-5.6)   | 0.04 | 115679 | 0 (0-3.7)   | 0.05 |
| 60-69              | 69075   | 0 (0-3.7)   | 0.03 | 91825  | 0 (0-3.7)   | 0.05 | 145284 | 2 (0.2-7.2) | 0.07 |
| 70-79              | 40734   | 0 (0-3.7)   | 0.04 | 54077  | 1 (0-5.6)   | 0.05 | 117216 | 0 (0-3.7)   | 0.11 |
| 80+                | 27388   | 0 (0-3.7)   | 0.01 | 32850  | 0 (0-3.7)   | 0.01 | 72944  | 1 (0-5.6)   | 0.02 |
| 21-DAY RISK WINDOW |         |             |      |        |             |      |        |             |      |
| Age Groups (Years) | Pfizer  |             |      |        |             |      |        |             |      |
|                    | Dose 1  |             |      | Dose 2 |             |      | Dose 3 |             |      |
|                    | No.     | Obs (95%CI) | Exp  | No.    | Obs (95%CI) | Exp  | No.    | Obs (95%CI) | Exp  |
| 12-17              | 137281  | 0 (0-3.7)   | 0.11 | 130628 | 2 (0.2-7.2) | 0.10 | 44991  | 0 (0-3.7)   | 0.04 |
| 18-29              | 283089  | 1 (0-5.6)   | 0.41 | 265600 | 3 (0.6-8.8) | 0.39 | 124611 | 0 (0-3.7)   | 0.18 |
| 30-39              | 247214  | 2 (0.2-7.2) | 0.36 | 232886 | 1 (0-5.6)   | 0.34 | 73207  | 0 (0-3.7)   | 0.11 |
| 40-49              | 209114  | 0 (0-3.7)   | 0.36 | 196125 | 1 (0-5.6)   | 0.34 | 68654  | 1 (0-5.6)   | 0.12 |
| 50-59              | 215932  | 0 (0-3.7)   | 0.30 | 197347 | 3 (0.6-8.8) | 0.27 | 76252  | 0 (0-3.7)   | 0.11 |
| 60-69              | 228753  | 1 (0-5.6)   | 0.35 | 200719 | 2 (0.2-7.2) | 0.30 | 89502  | 2 (0.2-7.2) | 0.14 |
| 70-79              | 180032  | 0 (0-3.7)   | 0.53 | 165274 | 1 (0-5.6)   | 0.49 | 83199  | 0 (0-3.7)   | 0.24 |
| 80+                | 101901  | 1 (0-5.6)   | 0.09 | 95991  | 1 (0-5.6)   | 0.08 | 45236  | 1 (0-5.6)   | 0.04 |
| Age Groups (Years) | Moderna |             |      |        |             |      |        |             |      |
|                    | Dose 1  |             |      | Dose 2 |             |      | Dose 3 |             |      |
|                    | No.     | Obs (95%CI) | Exp  | No.    | Obs (95%CI) | Exp  | No.    | Obs (95%CI) | Exp  |
| 12-17              | NA      | NA          | NA   | NA     | NA          | NA   | NA     | NA          | NA   |
| 18-29              | 96733   | 0 (0-3.7)   | 0.14 | 99895  | 2 (0.2-7.2) | 0.14 | 38483  | 0 (0-3.7)   | 0.06 |
| 30-39              | 85577   | 0 (0-3.7)   | 0.12 | 91762  | 3 (0.6-8.8) | 0.13 | 100495 | 1 (0-5.6)   | 0.15 |
| 40-49              | 65072   | 0 (0-3.7)   | 0.11 | 72715  | 0 (0-3.7)   | 0.13 | 94253  | 0 (0-3.7)   | 0.16 |
| 50-59              | 69115   | 0 (0-3.7)   | 0.10 | 82065  | 1 (0-5.6)   | 0.11 | 115679 | 0 (0-3.7)   | 0.16 |
| 60-69              | 69075   | 0 (0-3.7)   | 0.10 | 91825  | 0 (0-3.7)   | 0.14 | 145284 | 3 (0.6-8.8) | 0.22 |
| 70-79              | 40734   | 1 (0-5.6)   | 0.12 | 54077  | 1 (0-5.6)   | 0.16 | 117216 | 0 (0-3.7)   | 0.34 |
| 80+                | 27388   | 0 (0-3.7)   | 0.02 | 32850  | 0 (0-3.7)   | 0.03 | 72944  | 1 (0-5.6)   | 0.06 |

No. = Number

Obs = Observed

Exp = Expected

NA = Not applicable as doses were administered
